# Supplementary material for: Dendritic nonlinearities are tuned for efficient spike-based computations in cortical circuits
Source: eLife journal article supplement (doi:10.7554/elife.10056), 2015-12-24

**A**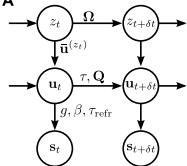**B**

| variables                            | parameters                                             |
|--------------------------------------|--------------------------------------------------------|
| $z$ population state                 | $\Omega$ state transition matrix                       |
| $u$ subthreshold membrane potentials | $\bar{u}^{(z_t)}$ resting potentials (state dependent) |
| $s$ spike counts                     | $\tau$ presynaptic time constant                       |
|                                      | $Q$ process noise covariance matrix                    |
|                                      | $g$ firing rate when $u = 0$                           |
|                                      | $\beta^{-1}$ spiking stochasticity                     |
|                                      | $\tau_{\text{refr}}$ refractory period                 |

**C**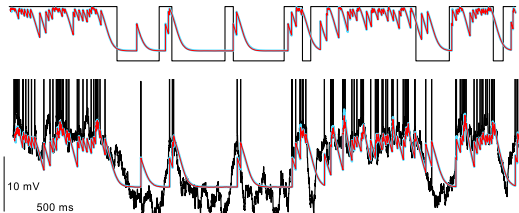

Supplement: supp [file elife-10056-supp-v1.zip]
