# Supplementary figures and images for: Dendritic nonlinearities are tuned for efficient spike-based computations in cortical circuits
Source: eLife journal article supplement (doi:10.7554/elife.10056), 2015-12-24

**A**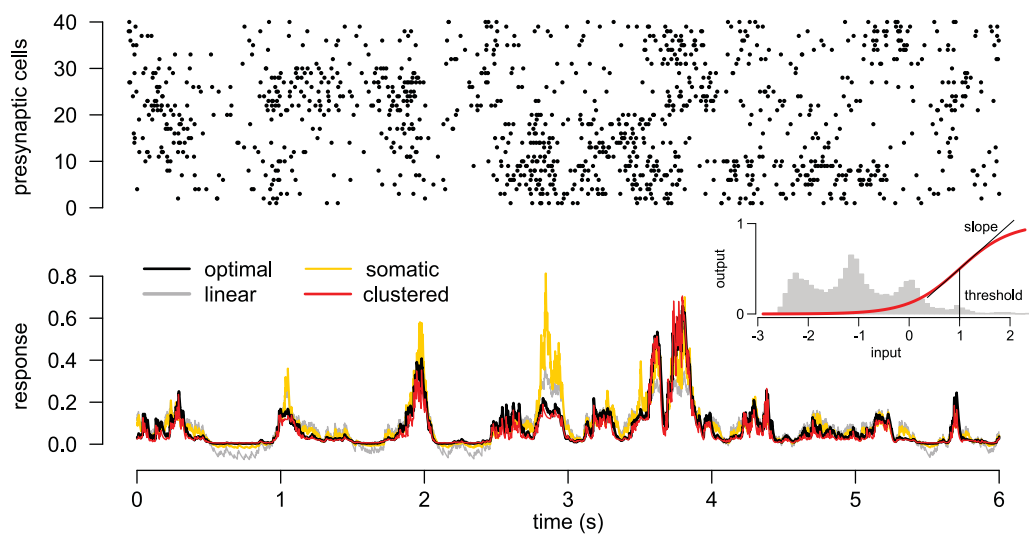**B**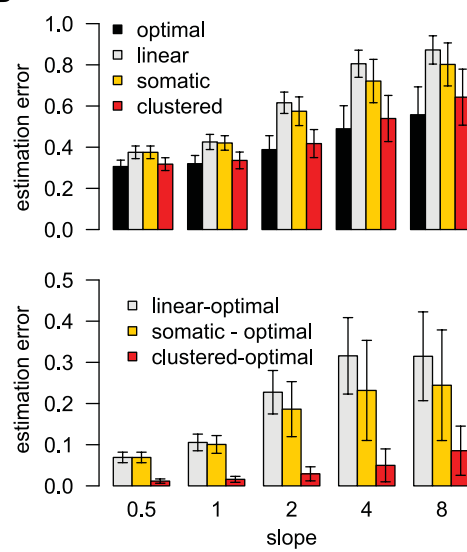

Supplement: supp [file elife-10056-supp-v1.zip]

**A**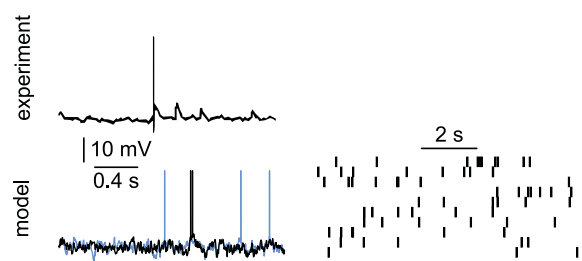**B**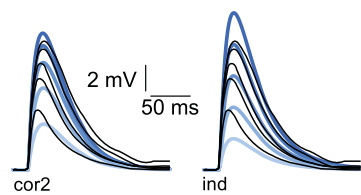**C**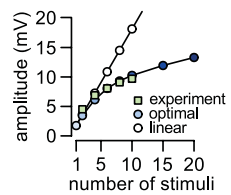**D**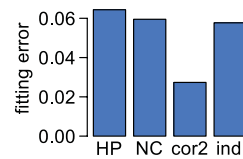

Supplement: supp [file elife-10056-supp-v1.zip]

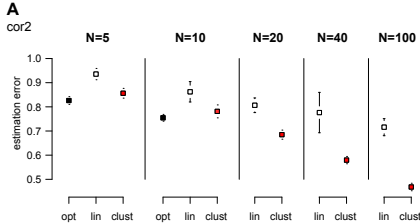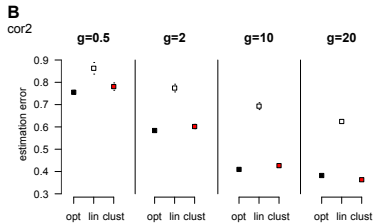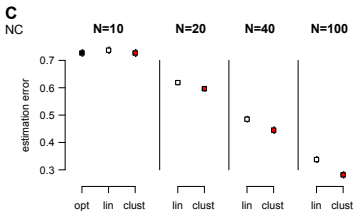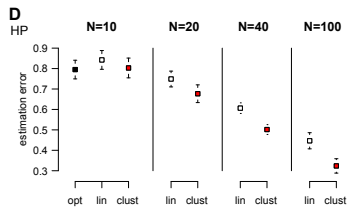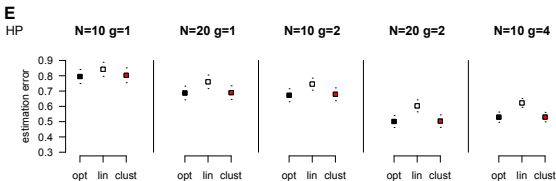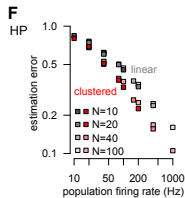

Supplement: supp [file elife-10056-supp-v1.zip]

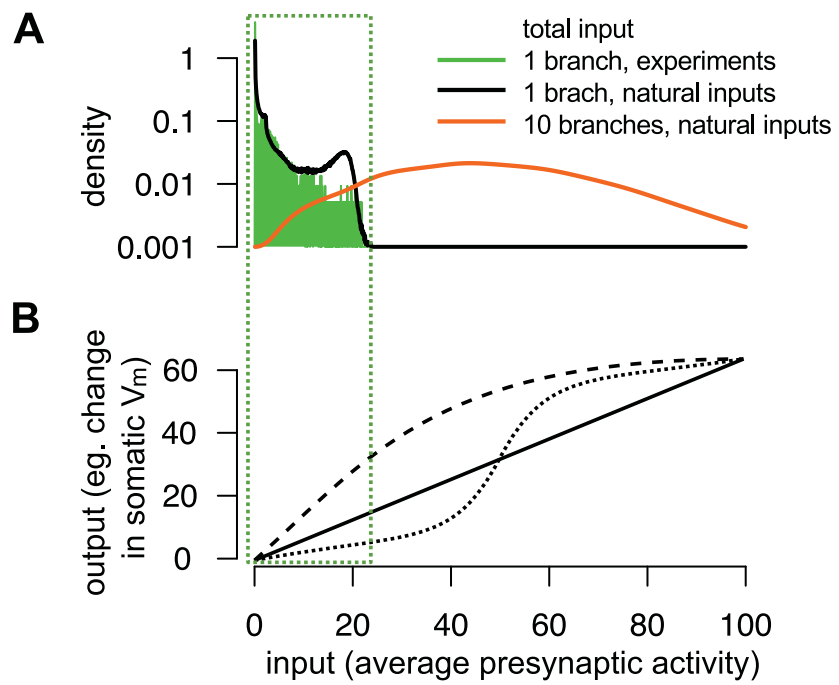

Supplement: supp [file elife-10056-supp-v1.zip]

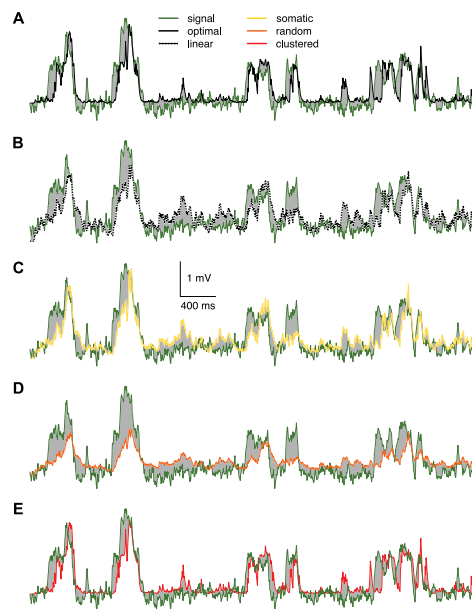

Supplement: supp [file elife-10056-supp-v1.zip]

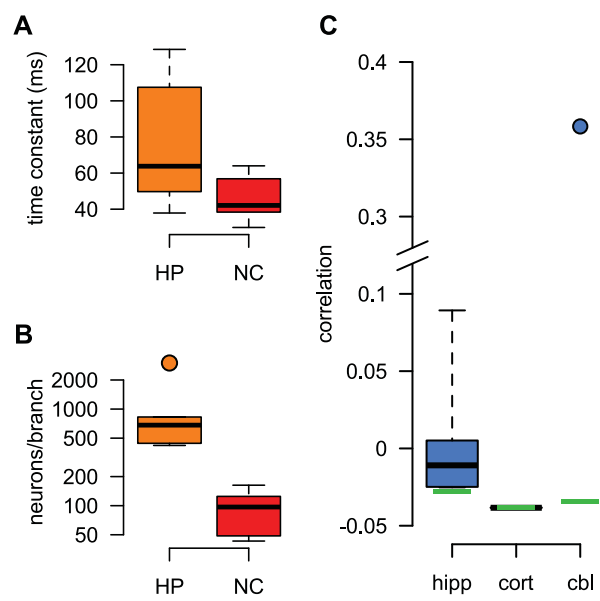

Supplement: supp [file elife-10056-supp-v1.zip]

**A**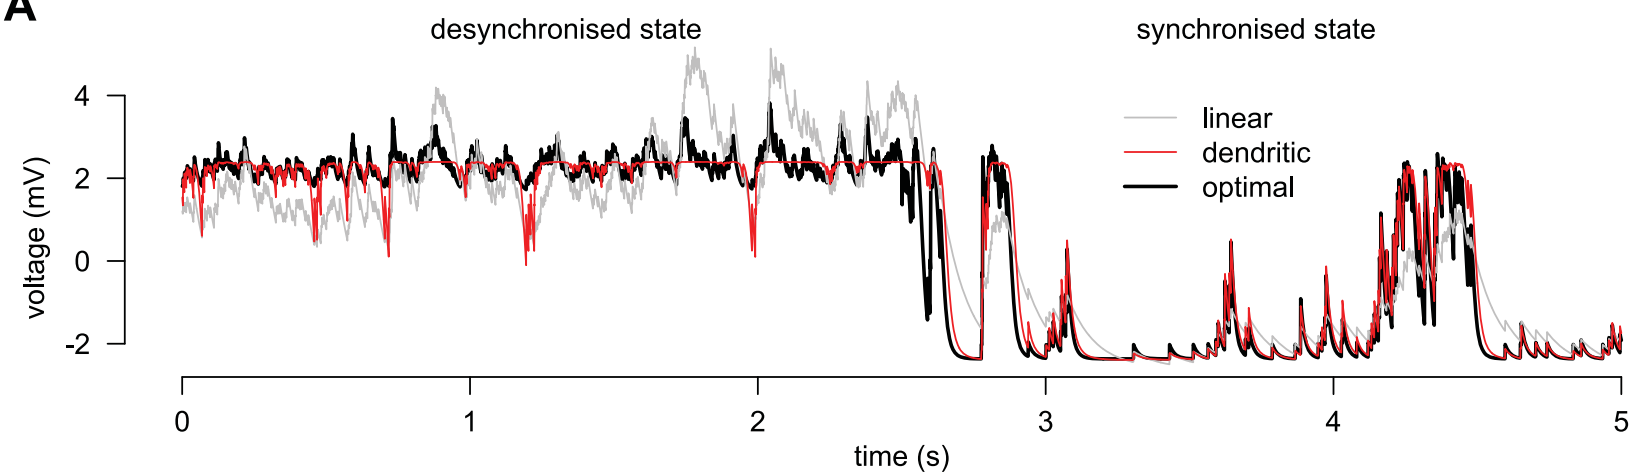**B**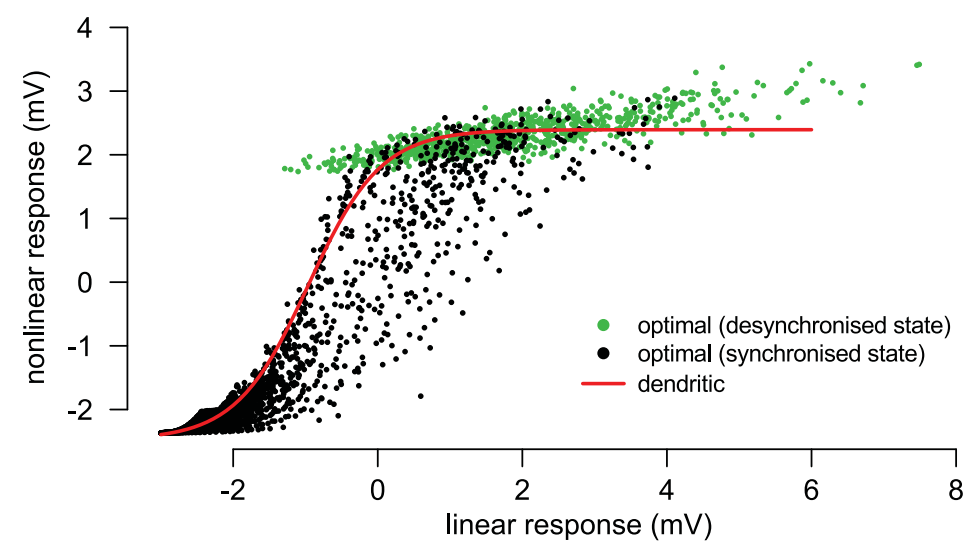**C**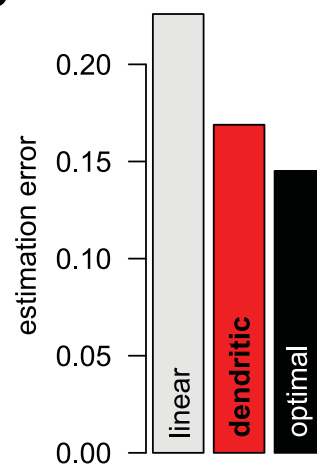

Supplement: supp [file elife-10056-supp-v1.zip]

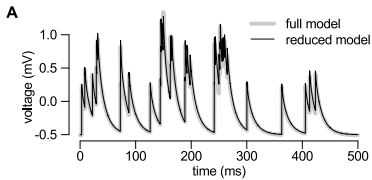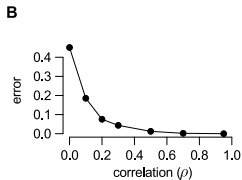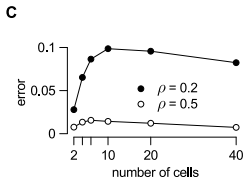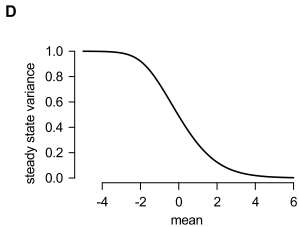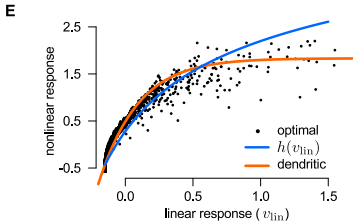

Supplement: supp [file elife-10056-supp-v1.zip]

**A**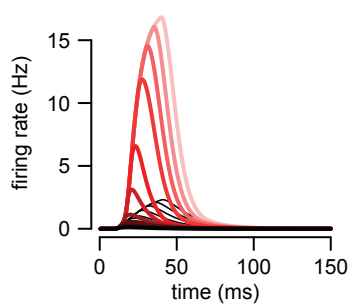**B**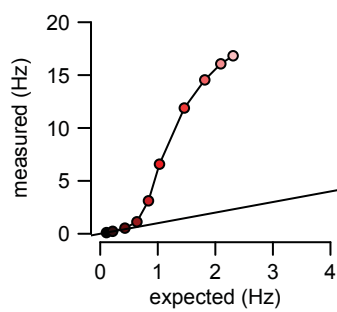**C**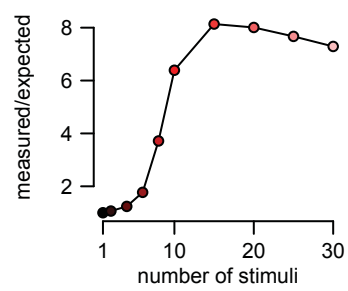

Supplement: supp [file elife-10056-supp-v1.zip]
